# Supplementary material
Source: publisher figshare collection journal article supplement (https://acs.figshare.com/ndownloader/files/18002291)
Supplement: Supplementary file 1 [file 18002291]

# Operando Near Ambient Pressure XPS Study of the CO Oxidation Reaction on the Oxide/Metal Model Catalyst ZnO/Pt(111)

Hang Liu,<sup>1,2</sup> Alter Zakhtser,<sup>1,3</sup> Ahmed Naitabdi,<sup>1\*</sup> François Rochet,<sup>1,4</sup> Fabrice Bournel,<sup>1,4</sup> Caroline Salzemann,<sup>3</sup> Christophe Petit,<sup>3</sup> Jean-Jacques Gallet,<sup>1,4</sup> and Wanqi Jie<sup>2</sup>

<sup>1</sup>Sorbonne Université, CNRS, Laboratoire de Chimie Physique Matière et Rayonnement, UMR 7614, 4 place Jussieu, 75005 Paris, France

<sup>2</sup>Northwestern Polytechnical University, School of Materials Science and Engineering, 127, Youyi Road, 710072, Xi'an, Shaanxi, China

<sup>3</sup>Sorbonne Université, CNRS, MONARIS, UMR 8233, 4 place Jussieu, 75005 Paris, France

<sup>4</sup>Synchrotron SOLEIL, L'Orme des Merisiers, Saint-Aubin, 91192 Gif sur Yvette, France

KEYWORDS: NAP-XPS, Platinum, Zinc-Oxide, Interface, Nanocatalysts, Carboxyls, Formates, In situ

## Supporting Information

**Table S1:** The normalized adsorbed CO intensities,  $R_{C1s}^{CO}(T) = \frac{I_{C1s}^{COads} - XPS(T)}{I_{C1s}^{COgas} - XPS(T)} \times p_{QMS}^{CO}(T)$ , as a function of the temperature. Time is the acquisition time of the  $P_{QMS}^{CO}$  corresponding to each C 1s XPS.  $P_{QMS}^{CO}$  indicates the corresponding pressure of CO monitored by QMS.  $I_{C1s}^{COgas} - XPS$  and  $I_{C1s}^{COads} - XPS$  are the integral intensities calculated from the fitting of the CO gas phase and the adsorbed CO peaks in C 1s XPS.

| Temperature (K) | Time (min) | $P_{QMS}^{CO}$ (mbar) | $I_{C1s}^{COgas} - XPS$ | $I_{C1s}^{COads} - XPS$ | Normalized $R_{C1s}^{CO}$ |
|-----------------|------------|-----------------------|-------------------------|-------------------------|---------------------------|
| 293             | 19         | 0.25                  | 1.20                    | 6.81                    | 1                         |
| 410             | 330        | 0.22                  | 1.09                    | 6.53                    | 0.89                      |
| 445             | 485        | 0.16                  | 1.00                    | 7.26                    | 0.80                      |
| 465             | 681        | 0.13                  | 0.80                    | 6.86                    | 0.74                      |

**Table S2:** The fitting parameters of the formate and the carboxyl in C 1s XPS of ZnO/Pt(111) and the evolution of the  $I_{\text{Formate}}/I_{\text{Carboxyl}}$  ratio as a function of the temperature.

|       | Formate |      | Carboxyl |      | $I_{\text{Formate}}/I_{\text{Carboxyl}}$ |
|-------|---------|------|----------|------|------------------------------------------|
|       | BE      | FWHM | BE       | FWHM |                                          |
| 293 K | 289.51  | 0.99 | 288.79   | 1.00 | 0.43                                     |
| 410 K | 289.59  | 0.95 | 288.92   | 1.00 | 0.66                                     |
| 445 K | 289.57  | 0.99 | 288.83   | 1.00 | 1.51                                     |
| 465 K | 289.65  | 1.00 | 288.95   | 1.00 | 1.65                                     |
| 485 K | 289.65  | 0.99 | 288.91   | 1.00 | 3.31                                     |
| 520 K | 289.53  | 1.10 | 288.80   | 1.10 | 3.54                                     |

**Table S3:** The calibrated formate/carboxyl intensities as a function of the temperature,

$R_{\text{C1s}}^{\text{carboxyl/formate}}(T) = \frac{I_{\text{C1s NAP-XPS}}^{\text{carboxyl/formate}}(T)}{I_{\text{C1s NAP-XPS}}^{\text{COgas}}(T)} \times p_{\text{QMS}}^{\text{CO}}(T)$ . Time is the acquisition time of the  $P_{\text{QMS}}^{\text{CO}}$  corresponding to each C 1s XPS.  $P_{\text{QMS}}^{\text{CO}}$  indicates the corresponding pressure of CO monitored by QMS.  $I_{\text{C1s NAP-XPS}}^{\text{COgas}}$  is the integral intensity obtained from the fitting of the CO gas phase peaks in the XPS C 1s spectra, and  $I_{\text{C1s NAP-XPS}}^{\text{carboxyl/formate}}$  is the ratio of carboxyls/formates integral intensities as obtained from the fitting the carboxyls and formates peaks in the C 1s XPS spectra.

| Temperature (K) | Time (min) | $p_{\text{QMS}}^{\text{CO}}$ (mbar) | $I_{\text{C1s NAP-XPS}}^{\text{COgas}}$ | $I_{\text{C1s NAP-XPS}}^{\text{COads}}$ | $I_{\text{C1s NAP-XPS}}^{\text{carboxyl/formate}}$ | $R_{\text{C1s}}^{\text{carboxyl/formate}}$ |
|-----------------|------------|-------------------------------------|-----------------------------------------|-----------------------------------------|----------------------------------------------------|--------------------------------------------|
| 293             | 28         | 0.25                                | 2.19                                    | 3.88                                    | 2.6                                                | 0.30                                       |
| 410             | 571        | 0.18                                | 1.45                                    | 3.84                                    | 2.0                                                | 0.25                                       |
| 445             | 732        | 0.17                                | 1.30                                    | 3.38                                    | 2.07                                               | 0.27                                       |
| 465             | 914        | 0.13                                | 1.15                                    | 4.06                                    | 2.07                                               | 0.23                                       |
| 485             | 1108       | 0.09                                | 0.83                                    | 4.4                                     | 2.74                                               | 0.29                                       |

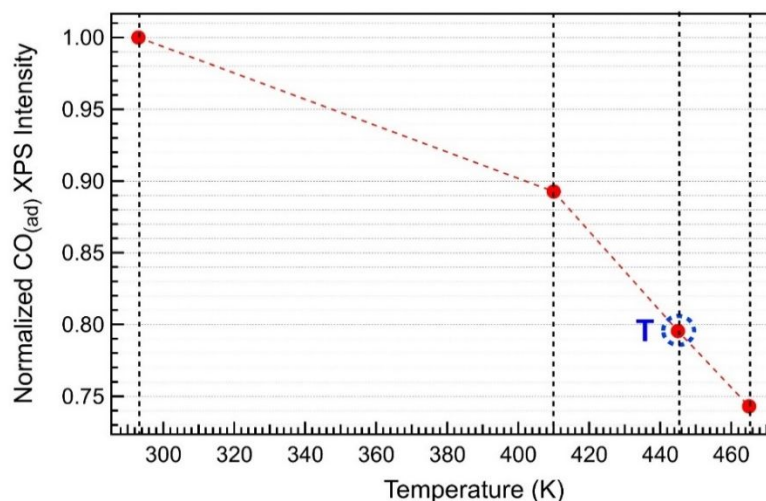

**Figure S1.** The normalized adsorbed CO intensities on Pt(111) as a function of the heating temperature.

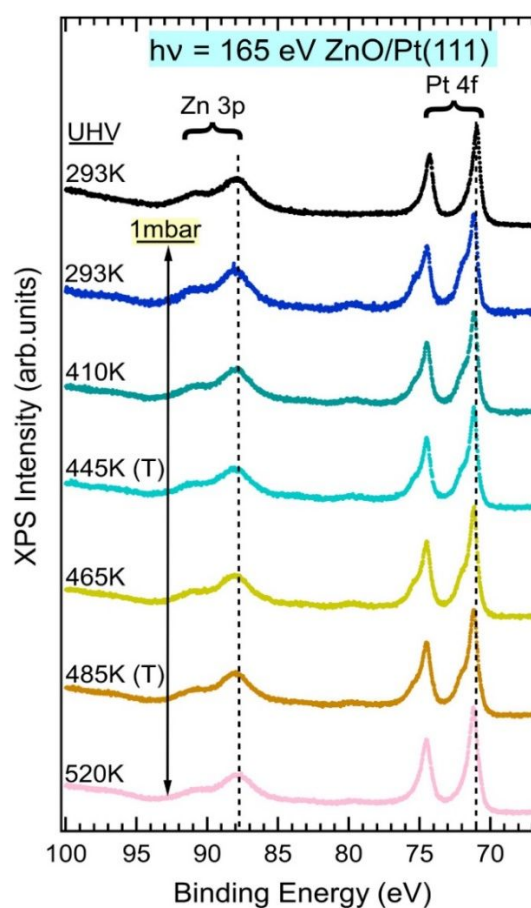

**Figure S2.** Pt 4f and Zn 3p binding energy region of the ZnO/Pt(111) sample measured at  $h\nu = 165$  eV in a (CO:O<sub>2</sub>) mixture (1:4) under a total pressure of 1 mbar. The spectra denoted UHV are recorded at 293 K before exposure to gases.

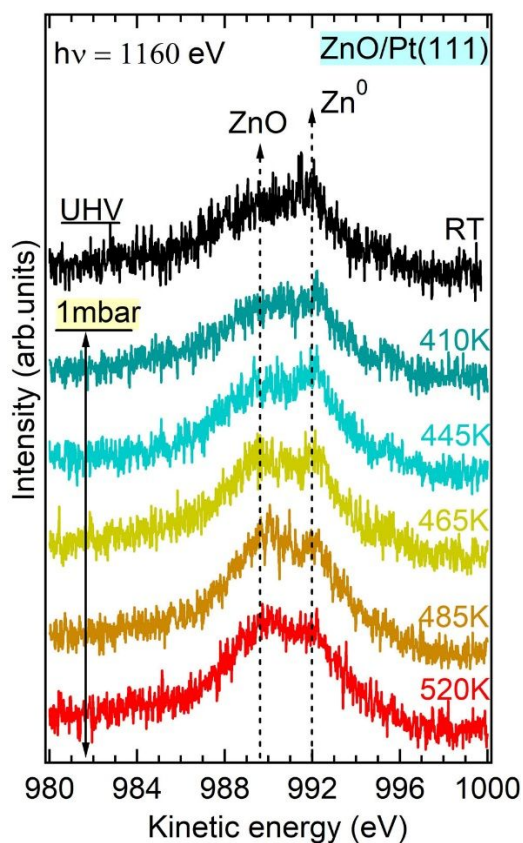

**Figure S3.** Zn LMM Auger-electron spectra of the ZnO/Pt(111) sample measured at photon energy  $h\nu = 1160$  eV in a (CO:O<sub>2</sub>) mixture (1:4) under a total pressure of 1 mbar. The spectrum denoted UHV was recorded at room temperature (RT) on the sample as prepared in UHV before exposure to gases.

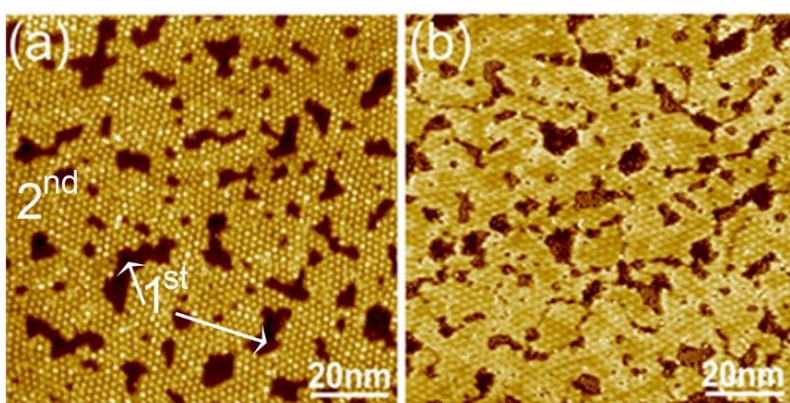

**Figure S4.** (a) STM image (2.6 V, 190 pA) of the as-deposited ZnO film on Pt(111) (~1.8 ML coverage); (b) STM image (2.4 V, 190 pA) of the same sample as (a) but after exposure to 1 mbar of the (CO:O<sub>2</sub>) mixture (1:4) at room temperature, followed by pumping down to UHV. 2<sup>nd</sup> and 1<sup>st</sup> indicate the second and first ZnO layers on Pt(111), respectively.

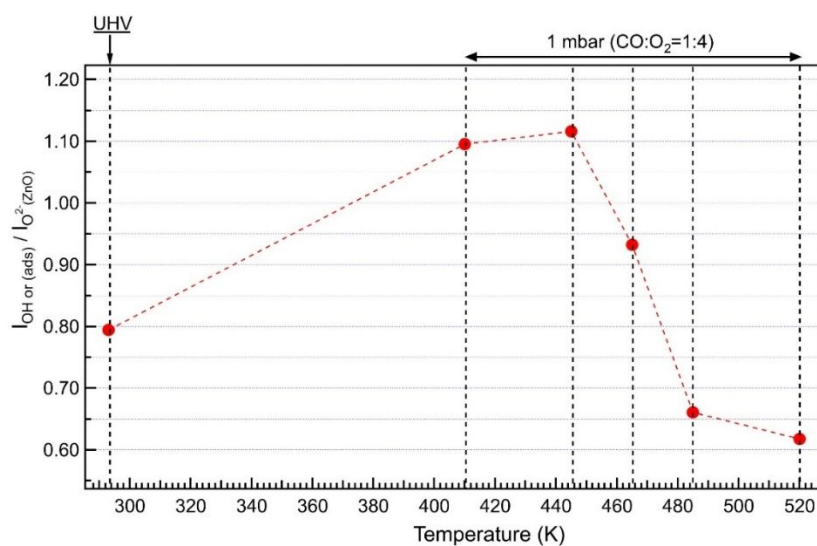

**Figure S5.** The evolution of the  $I_{OH \text{ or } (ads)} / I_{O^{2-}(ZnO)}$  ratio as a function of the temperature at 1 mbar of (CO: O<sub>2</sub>) mixture (1: 4) calculated from the O 1s spectra of the ZnO/Pt(111).
